# Supplementary material
Source: PubMed Central journal article supplement (PMC3911164)
Supplement: JB.00942-13_zjb999093006so1.pdf [file JB.00942-13_zjb999093006so1.pdf]

## Supplemental Figure Legends

**Figure S1.** Time-course development of *in vivo* nitrogenase activity in *A. vinelandii* DJ estimated by the acetylene reduction assay. Data are the average of three biological replicates ( $\pm$ SE).

**Figure S2.** *A. vinelandii nif* regulon. (A) Distribution of putative binding motifs for elements involved in *nif* gene initiation of transcription. Red denotes the size of the intergenic region (non-coding DNA) between transcriptional units. (B) Number of motifs expected randomly in a 500-bp DNA fragment. (C) Consensus sequences logo and position weight matrix (PWM) of binding sites for  $\sigma^{54}$  (square), IHF (diamond), and NifA UAS (circle) in *A. vinelandii*. Logos and PWMs were created using Web-LOGO <http://weblogo.berkeley.edu/logo.cgi> and Unipro UGENE software <http://ugene.unipro.ru>, respectively.

**Figure S3.** (A) Immunoblots to detect cellular levels of NifDK, NifH, NifB, NifEN, NifU, NifQ, NifX and NifY in wild type and the  $\Delta fdxN$  strains. Time elapsed after  $\text{NH}_4^+$  removal from the medium is indicated at the top of the panels. (B) Immunoblots of known amounts of purified proteins used to generate quantification standard curves. Squared correlation coefficients  $R^2$  are shown to the right of the panel.

**Figure S4.** Time-dependent profile of *nif* gene expression upon nitrogen step-down in wild-type *A. vinelandii* (closed symbols) and the  $\Delta nifA$  mutant (open symbols). In each sample, cDNA was quantified by qRT-PCR using standard curves generated with known amounts of the corresponding synthetic DNA amplicon. Data was then normalized to 16 rRNA content of each sample to yield the normalized absolute signal (NAS) parameter. In the figure, genes are organized according to chromosomal clustering. Data are the average of three biological replicates ( $\pm$ SE).

**Figure S5.** Time-dependent profile of *nif* gene expression upon nitrogen step-down in wild-type *A. vinelandii* (closed symbols) and the  $\Delta fdxN$  mutant (open symbols). Experimental conditions are described in Figure S4. Data are the average of three biological replicates ( $\pm$ SE).

**Figure S6.** Time-dependent profile of *nif* gene expression upon nitrogen step-down in wild-type *A. vinelandii* (closed symbols) and the  $\Delta nifDK$  mutant (open symbols). Experimental conditions are described in Figure S4. Data are the average of three biological replicates ( $\pm$ SE).

**Figure S7.** Time-dependent profile of *nif* gene expression upon nitrogen step-down in wild-type *A. vinelandii* (closed symbols) and the  $\Delta nifB$  mutant (open symbols). Experimental conditions are described in Figure S4. Data are the average of three biological replicates ( $\pm$ SE).

**Table S1.** List of primers used for Quantitative Real Time-Polymerase Chain Reaction (qRT-PCR) experiments.

**Table S2.** *nif* mRNA levels in cultures of *A. vinelandii* growing with  $\text{NH}_4^+$  as nitrogen source.

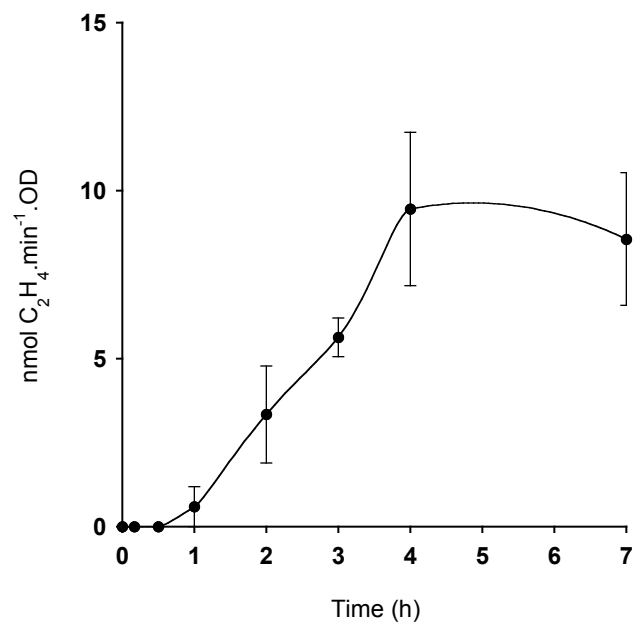

**A**

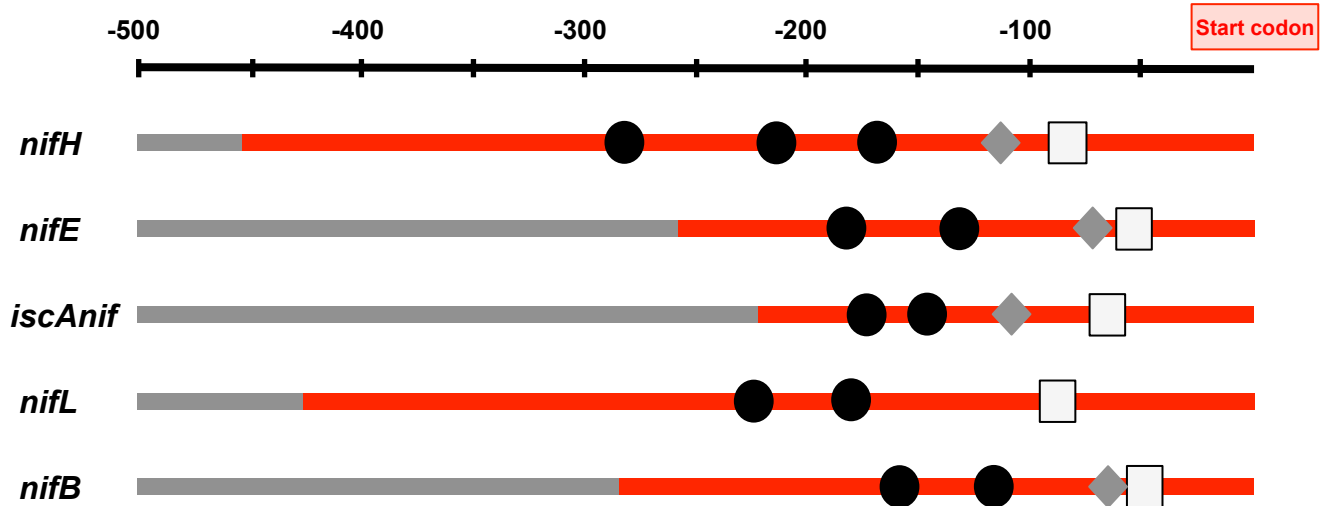

**B**

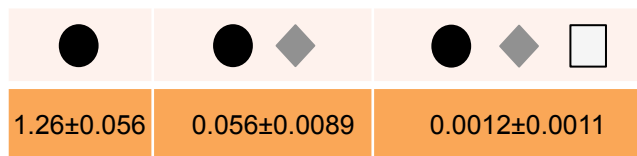

**C**

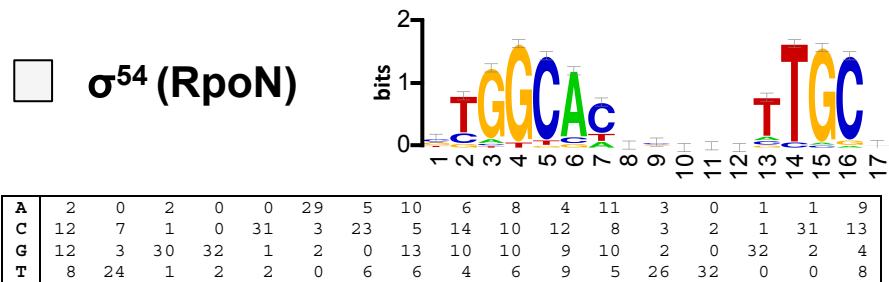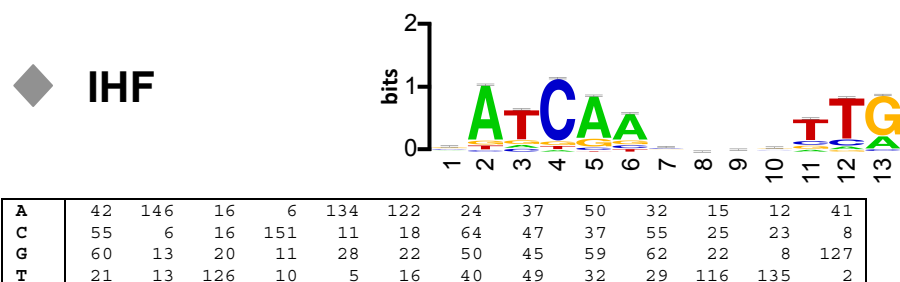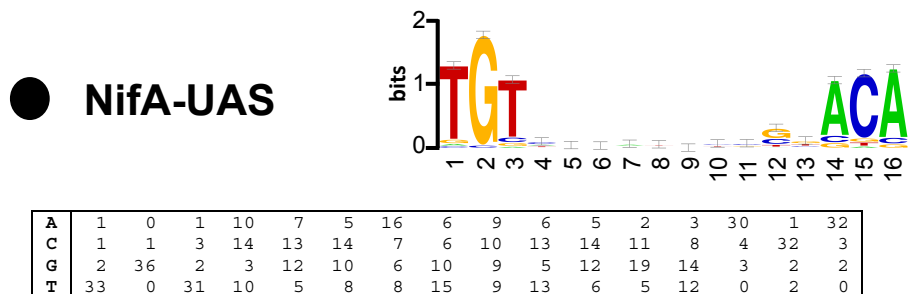

**A**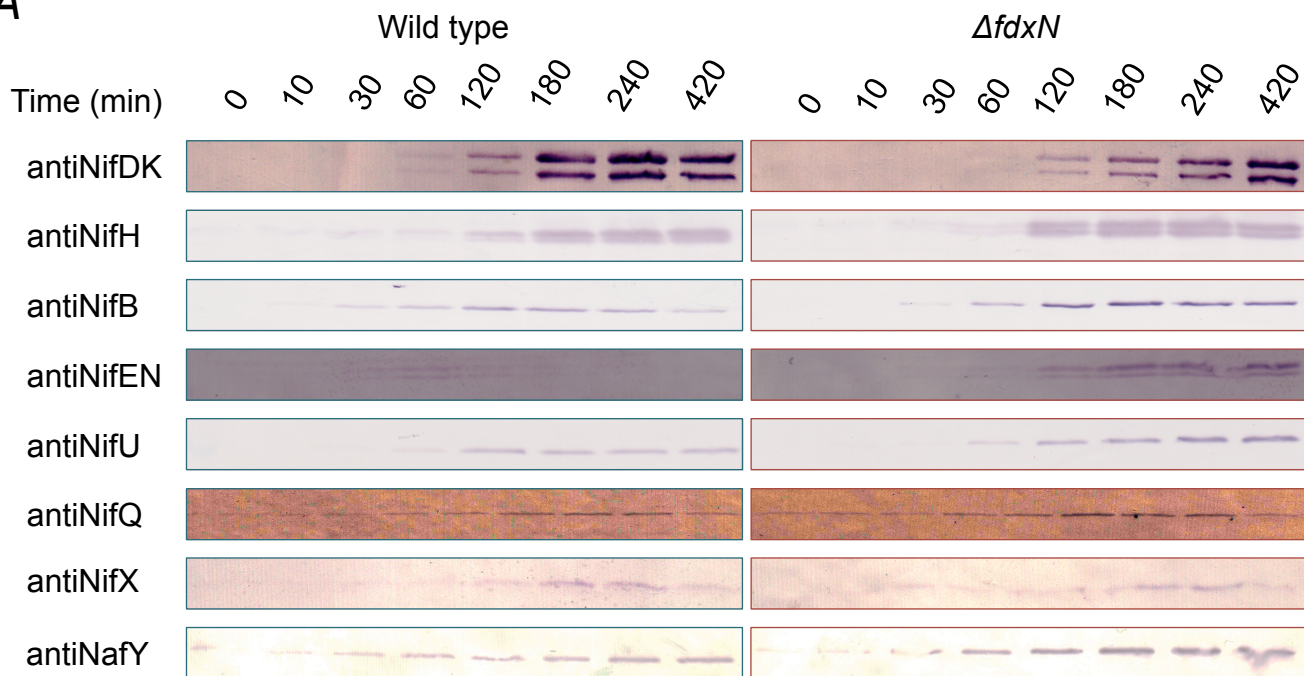**B**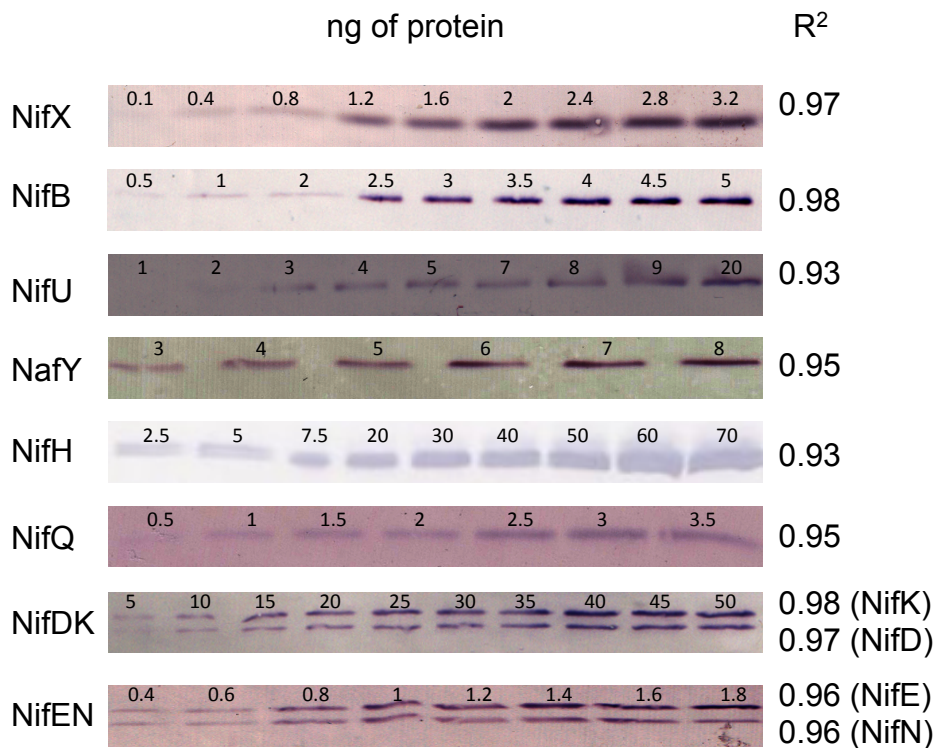

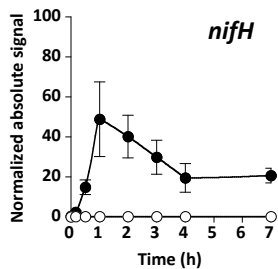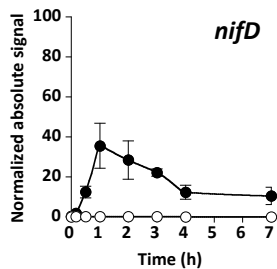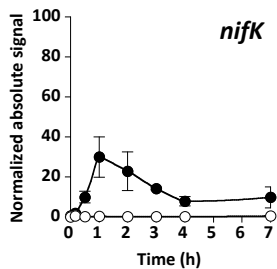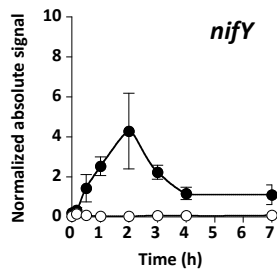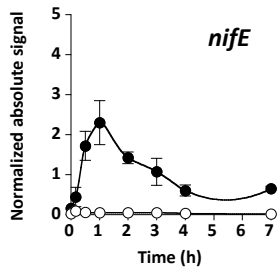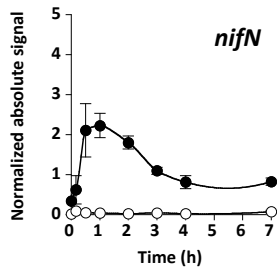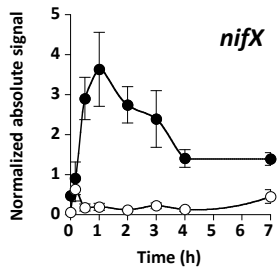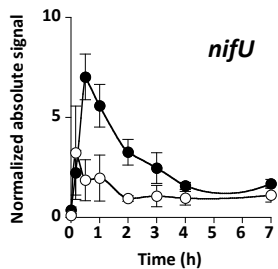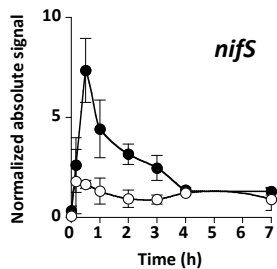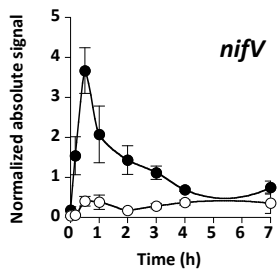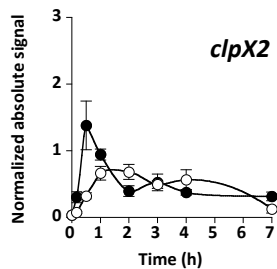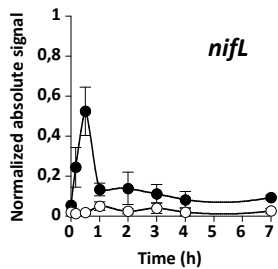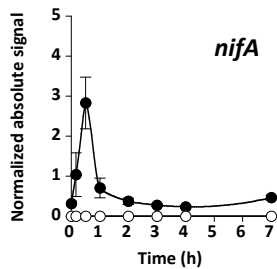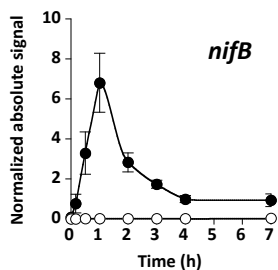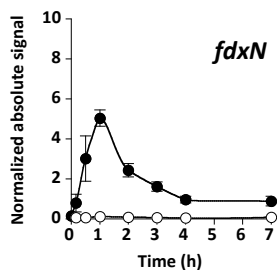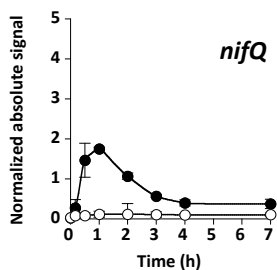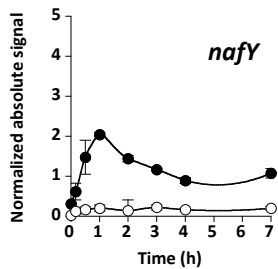

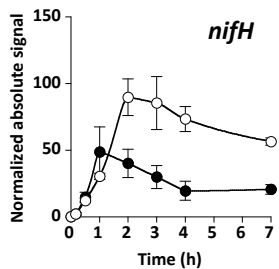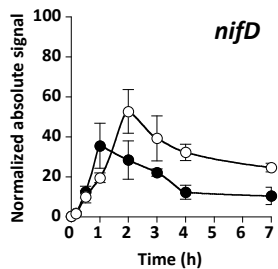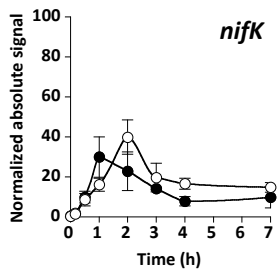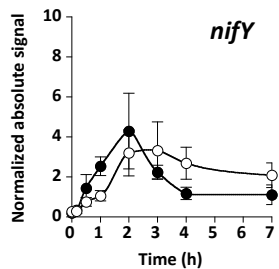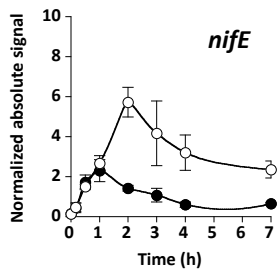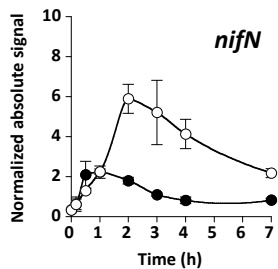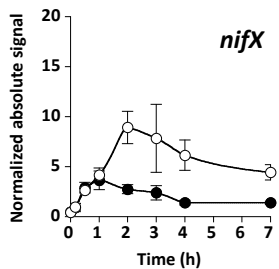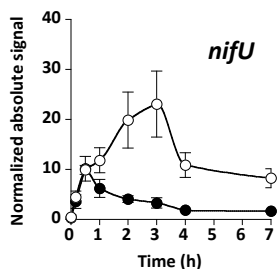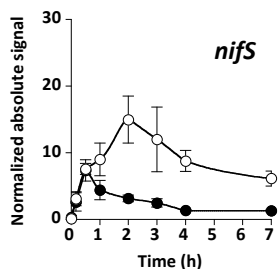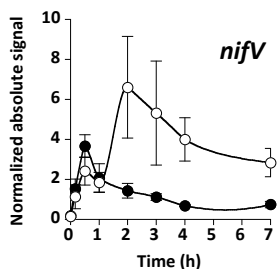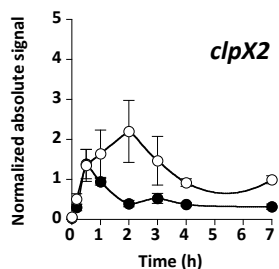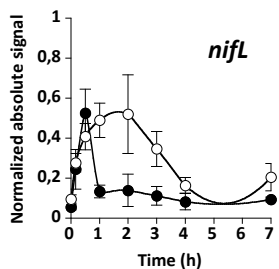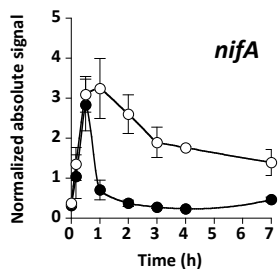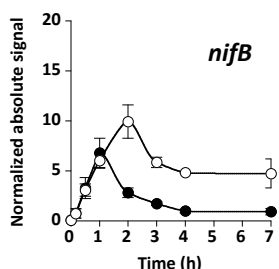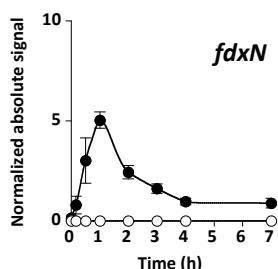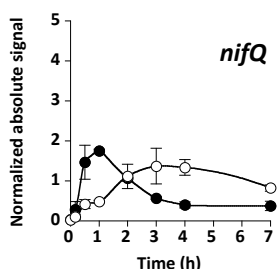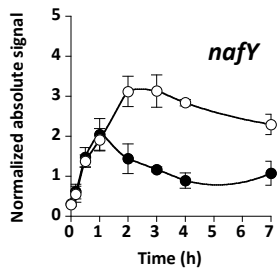

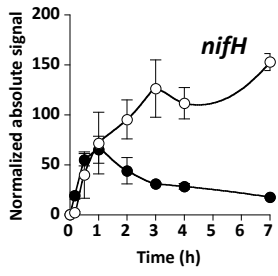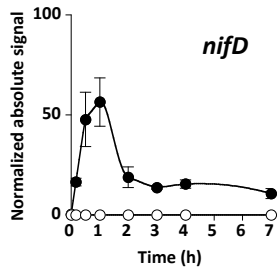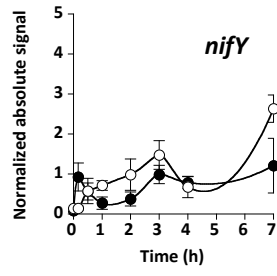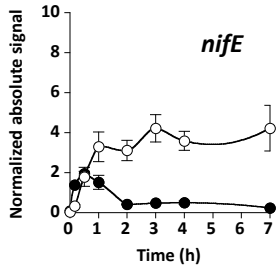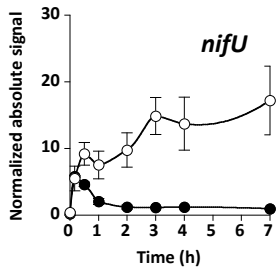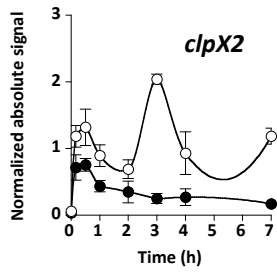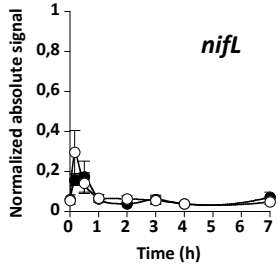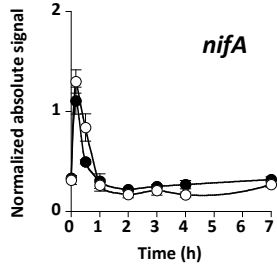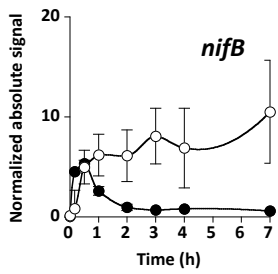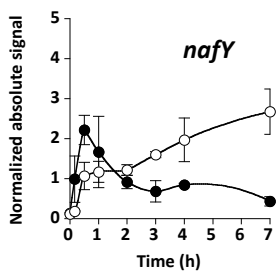



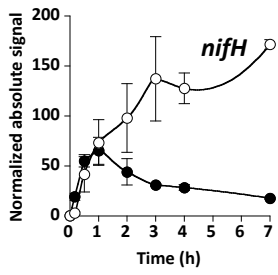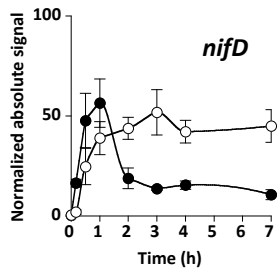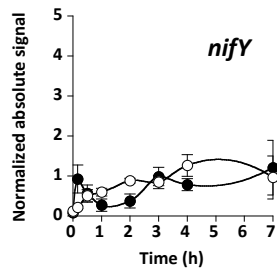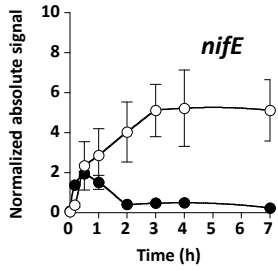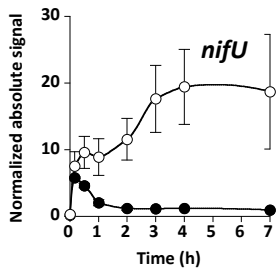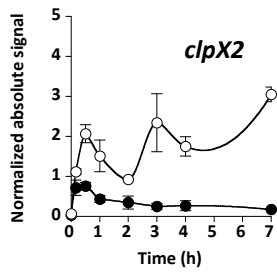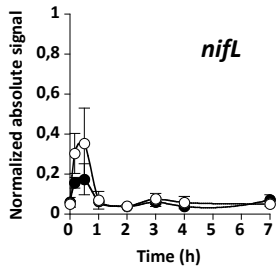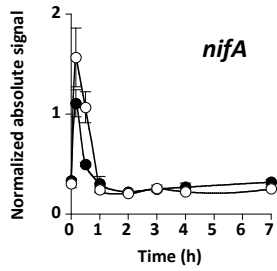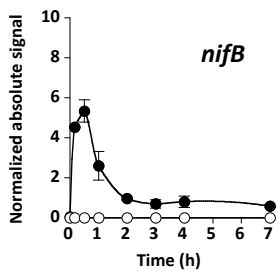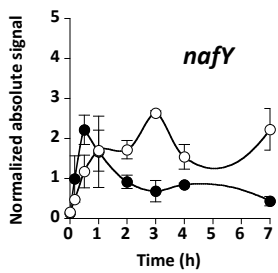

**Table S1.** List of primers used for Quantitative Real Time-Polymerase Chain Reaction (qRT-PCR) experiments.

| <b>Primer</b> | <b>Gene</b>    | <b>Sequence (5'-3')</b>  |
|---------------|----------------|--------------------------|
| 936           | <i>nifH</i>    | CCGCCAACAACATCTCCAA      |
| 937           | <i>nifH</i>    | TCTTCGCGGTTCGGTGTTAC     |
| 932           | <i>nifD</i>    | GCCGGCCGTCGTAACACTA      |
| 933           | <i>nifD</i>    | CACCGAACACGATGTCCTTCT    |
| 934           | <i>nifK</i>    | TGCGTTCGCTGGTCTTCAC      |
| 935           | <i>nifK</i>    | TCGAACTCCTTGCCCTTGTG     |
| 1156          | <i>nifY</i>    | CGCCTGGACGGCATCTT        |
| 1157          | <i>nifY</i>    | GGGTTCGCGTAGATCGATCA     |
| 942           | <i>nifE</i>    | CGTGCCCTTCTCGACAT        |
| 943           | <i>nifE</i>    | GGGCATTCCAGGGTGATG       |
| 944           | <i>nifN</i>    | TACCGCGGCAGCAGTCA        |
| 945           | <i>nifN</i>    | CCGGTTTTTGGCGATAGATC     |
| 1125          | <i>nifX</i>    | ACCCGACAATTGCAGGTATTG    |
| 1126          | <i>nifX</i>    | TCGGGATTGACCCCGTAGA      |
| 1121          | <i>nifU</i>    | AAGAGCACTTCTACAACCCCAAGA |
| 1122          | <i>nifU</i>    | AGGCGCAGCGCATCAC         |
| 1123          | <i>nifS</i>    | CCTCAGCCTGTGCGATTACC     |
| 1124          | <i>nifS</i>    | GCTGGCGTAATGCTCCAGAT     |
| 1119          | <i>nifV</i>    | GCGTGATCATCGACGACACT     |
| 1120          | <i>nifV</i>    | CGGGCGATAGCGATCTTCT      |
| 1265          | <i>clpX2</i>   | GTTGGAAGCACTGGTCTCG      |
| 1266          | <i>clpX2</i>   | TGGGCATGGAAACCGATA       |
| 1263          | <i>nifL</i>    | CGAGACGCTGGAAAACCA       |
| 1264          | <i>nifL</i>    | GCCCAGGTCTGAAGGAGAT      |
| 1115          | <i>nifA</i>    | CGCTCGGCCAAACAGAAC       |
| 1116          | <i>nifA</i>    | CCAGGGCCTGCAATTGC        |
| 940           | <i>nifB</i>    | CTCATCGAGCAGCAGCAGAA     |
| 941           | <i>nifB</i>    | TTCAGGTGCTCGTCGTTGAC     |
| 1129          | <i>fdxN</i>    | AATTGTTGGGCATGTGTCGAT    |
| 1130          | <i>fdxN</i>    | TCACACTCGGTGCACTTGCT     |
| 1117          | <i>nifQ</i>    | TCCTGCTGATGCACAATTTCC    |
| 1118          | <i>nifQ</i>    | ATCCTGTTCGCACAGTTGCTT    |
| 1127          | <i>nafY</i>    | GTGAACATGAGTCGCGAAACC    |
| 1128          | <i>nafY</i>    | TGATGCAGGATTCCAGCAA      |
| 903           | <i>16SrDNA</i> | GTAACGAGCGCAACCCTTGT     |
| 904           | <i>16SrDNA</i> | CTTGACGTCATCCCCACCTT     |

**Table S2.** *nif* mRNA levels in cultures of *A. vinelandii* growing with  $\text{NH}_4^+$  as nitrogen source.

| Gene         | NAS <sup>a</sup> |                    |
|--------------|------------------|--------------------|
|              | t=0 h            | t=4 h <sup>b</sup> |
| <i>nifH</i>  | 0.35±0.17        | 0.16±0.11          |
| <i>nifD</i>  | 0.33±0.12        | 0.22±0.09          |
| <i>nifK</i>  | 0.53±0.13        | 0.28±0.11          |
| <i>nifY</i>  | 0.20±0.08        | 0.07±0.01          |
| <i>nifE</i>  | 0.15±0.07        | 0.09±0.02          |
| <i>nifN</i>  | 0.34±0.14        | 0.25±0.05          |
| <i>nifX</i>  | 0.47±0.15        | 0.42±0.06          |
| <i>nifU</i>  | 0.36±0.22        | 0.13±0.05          |
| <i>nifS</i>  | 0.32±0.23        | 0.09±0.04          |
| <i>nifV</i>  | 0.18±0.08        | 0.08±0.03          |
| <i>clpX2</i> | 0.03±0.01        | 0.04±0.01          |
| <i>nifL</i>  | 0.054±0.01       | 0.09±0.03          |
| <i>nifA</i>  | 0.32±0.05        | 0.35±0.09          |
| <i>nifB</i>  | 0.09±0.06        | 0.02±0.01          |
| <i>fdxN</i>  | 0.15±0.09        | 0.05±0.01          |
| <i>nifQ</i>  | 0.03±0.01        | 0.01±0.001         |
| <i>nafY</i>  | 0.31±0.07        | 0.20±0.03          |

<sup>a</sup> Normalized absolute signals

<sup>b</sup> Cultures growing in the presence of  $\text{NH}_4^+$  during 4h  
Data is the average of at le
